# Supplementary material for: Surface-tension-free fabrication to minimize defects in cobalt-silica membranes via the freeze-drying technique for H 2 separation at high temperatures
Source: Royal Society of Chemistry journal article supplement (doi:10.1039/d5ta07063e), 2025-11-18
Supplement: d5ta07063e1.pdf [file d5ta07063e1.pdf]

## Supplementary Information

### Surface-Tension-Free Fabrication to Minimize Defects in Cobalt-Silica Membranes via Freeze Drying Technique for H<sub>2</sub> Separation at High Temperatures

Tanzila Anjum <sup>a</sup>, Hammad Saulat <sup>b</sup>, Gianni Olguin <sup>c</sup>, Xiaonan Kou <sup>a</sup>, Xian Yin <sup>a</sup>, Asim Laeeq Khan <sup>d</sup>, Guozhao Ji <sup>a,\*</sup>

<sup>a</sup> Key Laboratory of Industrial Ecology and Environmental Engineering, School of Environmental Science and Technology, Dalian University of Technology, Dalian 116000, P. R. China

<sup>b</sup> School of Chemical Engineering, Dalian University of Technology, Dalian 116000, P. R. China

<sup>c</sup> Pontificia Universidad Católica de Valparaíso, Escuela de Ingeniería Química, Valparaíso, Chile

<sup>d</sup> Department of Chemical Engineering, Faculty of Engineering, Islamic University of Madinah, Madinah 42351, Saudi Arabia

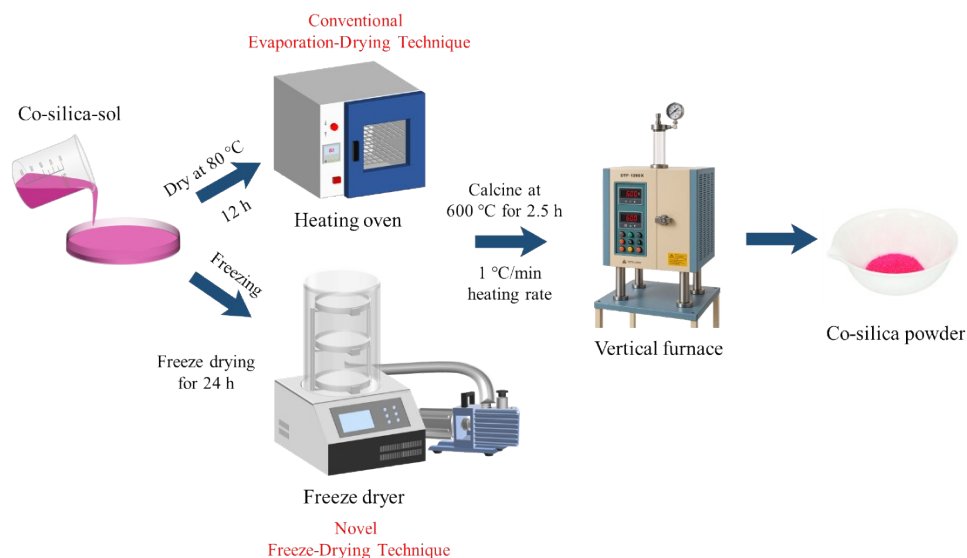

**Figure S1.** Schematic representation of the synthesis method of Co-silica powders via conventional evaporation-drying and novel freeze-drying technique

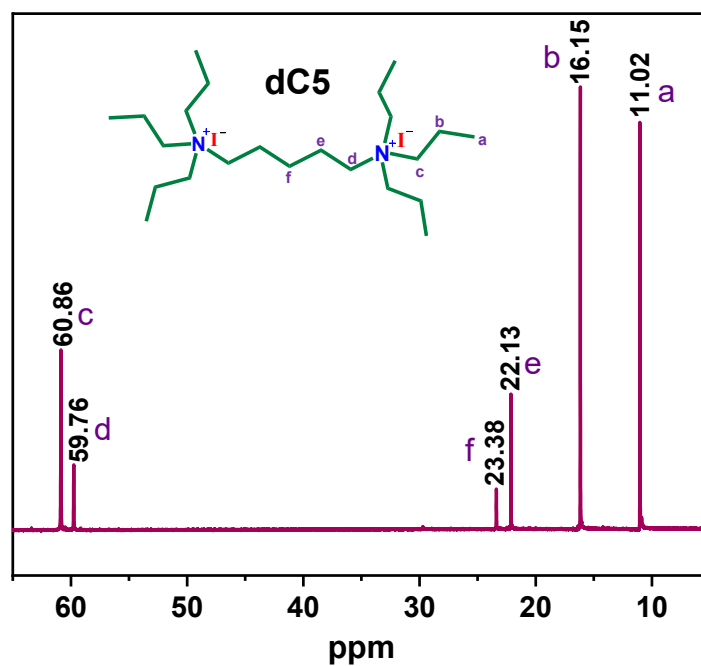

**Figure S2.**  $^{13}\text{C}$  NMR liquid spectrum of an aqueous solution of dC5 in deuterated chloroform ( $\text{CDCl}_3$ ) (The peaks of  $\text{CDCl}_3$  between 77.3 and 76.7 ppm are excluded from the graph)

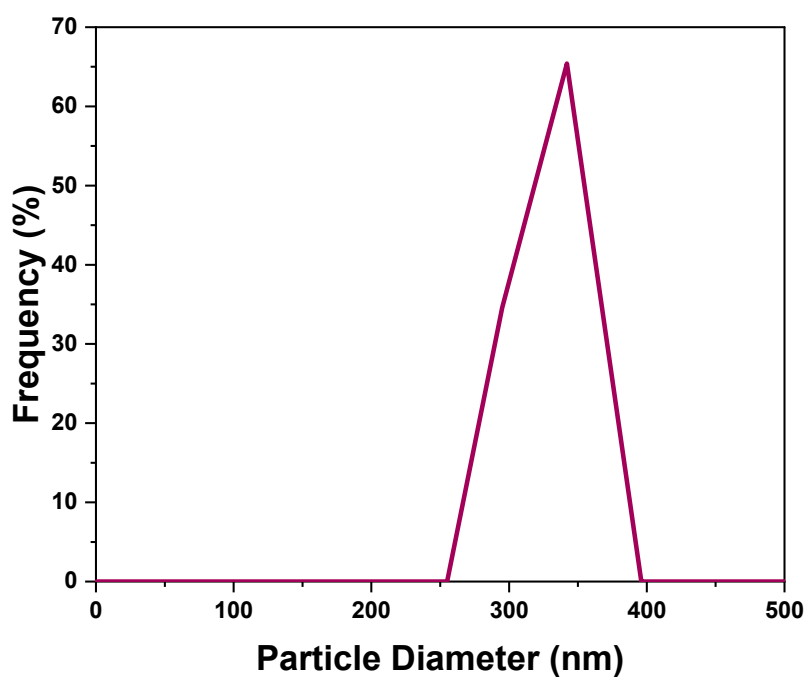

**Figure S3.** Dynamic Light Scattering (DLS) analysis of cobalt-silica sol

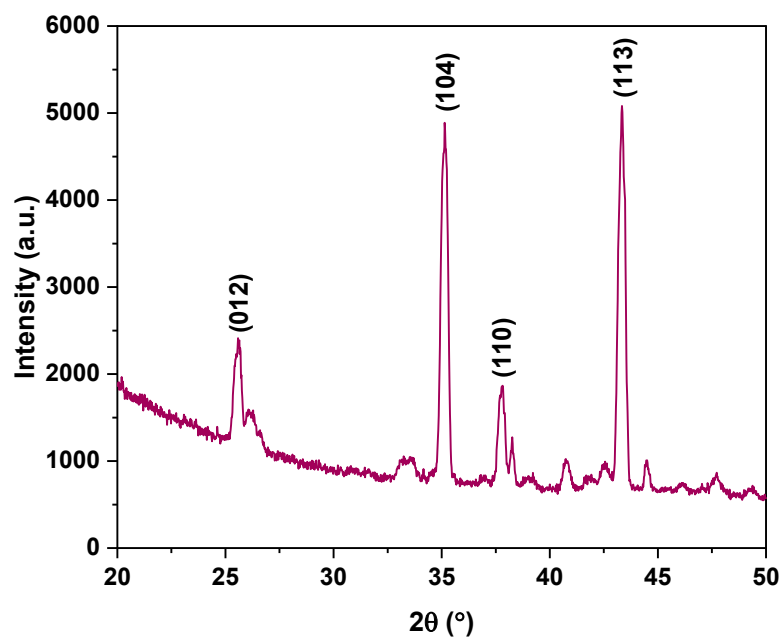

**Figure S4.** X-ray diffraction (XRD) analysis of  $\alpha$ -alumina supports

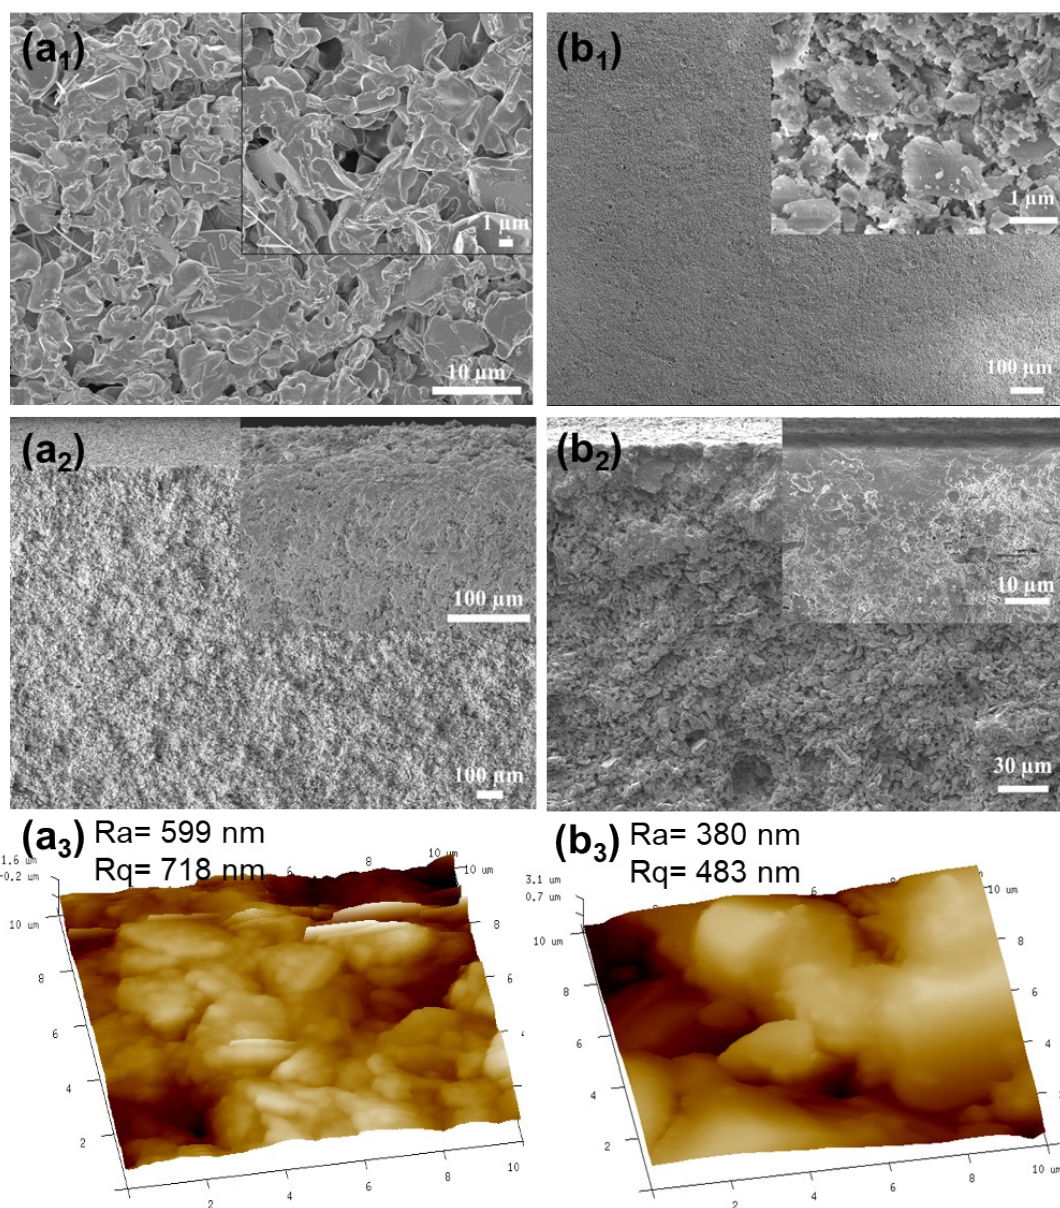

**Figure S5.** SEM surface and cross-section images with higher magnification in the insets and AFM images showing average roughness (Ra) and root mean square roughness (Rq), respectively (a<sub>1</sub>, a<sub>2</sub>, a<sub>3</sub>)  $\alpha$ -alumina substrate; (b<sub>1</sub>, b<sub>2</sub>, b<sub>3</sub>) MFI nanosheet interlayer
